# Supplementary material for: Association of Dual Decline in Cognition and Gait Speed With Risk of Dementia in Older Adults
Source: PubMed Central journal article supplement (PMC9157262; doi:10.1001/jamanetworkopen.2022.14647), 2022-05-31
Supplement: jamanetwopen-e2214647-s001.pdf [file jamanetwopen-e2214647-s001.pdf]

## Supplemental Online Content

Collyer TA, Murray AM, Woods RL, et al. Association of dual decline in cognition and gait speed with risk of dementia in older adults. *JAMA Netw Open*. 2022;5(5):e2214647. doi:10.1001/jamanetworkopen.2022.14647

**eTable 1.** Cognitive Change Within Tertiles

**eTable 2.** Overlap Between Cognitive Decline and Dual Decline Groupings

**eTable 3.** Participants Remaining At-Risk

**eTable 4.** Baseline Cognitive Scores, Gait Speed and Association With Dementia in Baseline-Only Cox Models

This supplemental material has been provided by the authors to give readers additional information about their work.

**eTable 1. Cognitive Change Within Tertiles**

| Average estimated annual change in raw score                                                               |                            |                            |                           |
|------------------------------------------------------------------------------------------------------------|----------------------------|----------------------------|---------------------------|
|                                                                                                            | Lowest Tertile<br>(95% CI) | Middle Tertile<br>(95% CI) | Upper Tertile<br>(95% CI) |
| 3MS                                                                                                        | -0.22 (-0.23, -0.22)       | +0.04 (0.040, 0.041)       | +0.20 (+0.193,0.198)      |
| SDMT                                                                                                       | -0.30 (-0.30, -0.29)       | +0.01 (0.011, 0.012)       | +0.28 (0.28, 0.29)        |
| HVLT-R                                                                                                     | -0.17 (-0.175, -0.168)     | +0.026 (0.025, +0.027)     | +0.16 (0.15, 0.16)        |
| COWAT-F                                                                                                    | -0.14 (-0.151, -0.148)     | -0.009 (-0.010, -0.008)    | +0.16 (0.15, 0.16)        |
| Inter-Quartile Range of estimated annual change (25 <sup>th</sup> percentile, 75 <sup>th</sup> Percentile) |                            |                            |                           |
|                                                                                                            | Lowest Tertile             | Middle Tertile             | Upper Tertile             |
| 3MS                                                                                                        | -0.29, -0.09               | +0.01, +0.08               | +0.14, +0.23              |
| SDMT                                                                                                       | -0.38, -0.15               | -0.02, +0.05               | +0.16, +0.36              |
| HVLT-R                                                                                                     | -0.22, -0.09               | -0.01, +0.06               | +0.12, +0.19              |
| COWAT-F                                                                                                    | -0.19, -0.09               | -0.04, +0.04               | +0.07, +0.20              |

3MS - Modified Mini-Mental State examination; HVLT-R- Hopkins Verbal Learning Test-Revised; SDMT- Symbol Digit Modalities; COWAT-F - Controlled Oral Word Association Test (single letter)

**eTable 2. Overlap Between Cognitive Decline and Dual Decline Groupings**

| <b>A. Cognitive Decline Groupings</b> |                 |                         |                       |                      |                        |
|---------------------------------------|-----------------|-------------------------|-----------------------|----------------------|------------------------|
|                                       | Total           | Lower tertile<br>HVLt-R | Lower tertile<br>SDMT | Lower tertile<br>3MS | Lower tertile<br>COWAT |
| Lower tertile<br>HVLt-R               | 5,597<br>(100%) |                         | 2,140 (38%)           | 3,271 (58%)          | 2,421 (43%)            |
| Lower tertile SDMT                    | 5,350<br>(100%) | 2,140 (40%)             |                       | 2,197 (41%)          | 2,078 (39%)            |
| Lower tertile 3MS                     | 5,577<br>(100%) | 3,271 (59%)             | 2,197 (39%)           |                      | 2,433 (44%)            |
| Lower tertile<br>COWAT                | 5,382<br>(100%) | 2,421 (44%)             | 2,078 (39%)           | 2,433 (45%)          |                        |
| <b>B. Dual Decline Groupings</b>      |                 |                         |                       |                      |                        |
|                                       | Total           | Dual Decline<br>HVLt-R  | Dual Decline<br>SDMT  | Dual Decline<br>3MS  | Dual Decline<br>COWAT  |
| Dual Decline<br>HVLt-R                | 1,590<br>(100%) |                         | 604 (38%)             | 907 (57%)            | 639 (40%)              |
| Dual Decline<br>SDMT                  | 1,456<br>(100%) | 604 (41%)               |                       | 643 (44%)            | 558 (38%)              |
| Dual Decline 3MS                      | 1,569<br>(100%) | 907 (58%)               | 643 (41%)             |                      | 667 (43%)              |
| Dual Decline<br>COWAT                 | 1,397<br>(100%) | 639 (46%)               | 558 (40%)             | 667 (48%)            |                        |

HVLt-R- Hopkins Verbal Learning Test-Revised; SDMT- Symbol Digit Modalities; 3MS - Modified Mini-Mental State examination; COWAT-F - Controlled Oral Word Association Test (single letter).

Dual-Decline - Longitudinal decline in gait speed of  $\geq 0.05\text{m/s/y}$  plus annualised cognitive change in lowest tertile of sample.

**eTable 3. Participants Remaining At-Risk**

(Cumulative Hazard Function for Dementia, Death as Competing Risk)

| <b>Cognitive Measure</b>                    | <b>Years Since Randomisation</b> |          |          |          |          |          |
|---------------------------------------------|----------------------------------|----------|----------|----------|----------|----------|
|                                             | <b>2</b>                         | <b>3</b> | <b>4</b> | <b>5</b> | <b>6</b> | <b>7</b> |
| <b>Global Cognition (3MS)</b>               |                                  |          |          |          |          |          |
| No Decline                                  | 8436                             | 7473     | 5804     | 3666     | 1415     | 48       |
| Cog Only                                    | 4008                             | 3662     | 2908     | 1908     | 655      | 33       |
| Gait Only                                   | 2842                             | 2371     | 1647     | 990      | 342      | 6        |
| Dual Decline                                | 1567                             | 1347     | 926      | 567      | 169      | 4        |
| <b>Memory (HVLt-R)</b>                      |                                  |          |          |          |          |          |
| No Decline                                  | 8369                             | 7468     | 5839     | 3710     | 1453     | 53       |
| Cog Only                                    | 4007                             | 3622     | 2846     | 1851     | 606      | 30       |
| Gait Only                                   | 2349                             | 2349     | 1641     | 996      | 321      | 7        |
| Dual Decline                                | 1588                             | 1348     | 923      | 557      | 187      | 4        |
| <b>Attention-Speed of processing (SDMT)</b> |                                  |          |          |          |          |          |
| No Decline                                  | 8510                             | 7351     | 5599     | 3459     | 1251     | 33       |
| Cog Only                                    | 3894                             | 3756     | 3101     | 2106     | 808      | 48       |
| Gait Only                                   | 2928                             | 2335     | 1532     | 879      | 269      | 5        |
| Dual Decline                                | 1363                             | 1363     | 1030     | 671      | 241      | 5        |
| <b>Verbal fluency (COWAT-F)</b>             |                                  |          |          |          |          |          |
| No Decline                                  | 8447                             | 7376     | 5630     | 3482     | 1295     | 39       |
| Cog Only                                    | 3756                             | 3756     | 3080     | 2091     | 767      | 42       |
| Gait Only                                   | 3000                             | 2429     | 1628     | 965      | 304      | 7        |
| Dual Decline                                | 1397                             | 1281     | 940      | 590      | 204      | 4        |

3MS - Modified Mini-Mental State examination; HVLt-R- Hopkins Verbal Learning Test-Revised; SDMT-Symbol Digit Modalities; COWAT-F - Controlled Oral Word Association Test (single letter)

**eTable 4. Baseline Cognitive Scores, Gait Speed and Association With Dementia in Baseline-Only Cox Models**

|                                   | Baseline Score Model |             |                          |             | Combined Baseline Indicator Model                                                  |             |
|-----------------------------------|----------------------|-------------|--------------------------|-------------|------------------------------------------------------------------------------------|-------------|
|                                   | Baseline Gait Speed  |             | Baseline Cognitive Score |             | Indicator Variable: Lowest Tertile for cognition <i>and</i> Gait Speed at baseline |             |
|                                   | HR                   | 95% CI      | HR                       | 95% CI      | HR                                                                                 | 95% CI      |
| Global Cognition<br>(3MS score)   | 0.56                 | 0.35 - 0.90 | 0.85                     | 0.84 - 0.87 | 3.20                                                                               | 2.57 – 4.00 |
| Processing Speed (SDMT<br>score)  | 0.60                 | 0.38 - 0.97 | 0.93                     | 0.92 - 0.94 | 2.93                                                                               | 2.33 - 3.67 |
| Memory<br>(HVLТ-R score)          | 0.45                 | 0.28 - 0.72 | 0.75                     | 0.73 - 0.78 | 3.16                                                                               | 2.54 – 3.91 |
| Verbal Fluency (COWAT-F<br>score) | 0.41                 | 0.25 – 0.66 | 0.94                     | 0.91 – 0.96 | 1.86                                                                               | 1.48 - 2.36 |

All models also adjusted for age at randomisation, gender, education and country (Australia/US). HR = Hazard Ratio  
 3MS - Modified Mini-Mental State examination; HVLТ-R- Hopkins Verbal Learning Test-Revised; SDMT-Symbol Digit Modalities; COWAT-F - Controlled Oral Word Association Test (single letter).
